# Supplementary material for: Structure of a translocation signal domain mediating conjugative transfer by type IV secretion systems
Source: PubMed Central journal article supplement (PMC3912908; doi:10.1111/mmi.12275), 2013-06-14
Supplement: mmi0089-0324-sd1.pdf [file mmi0089-0324-sd1.pdf]

**Table S1: Data collection and refinement statistics**

| <b>Protein</b>          | <b>TraI - TSA</b>                 |
|-------------------------|-----------------------------------|
| Cell                    | 109.17, 109.17, 56.80             |
| $\alpha, \beta, \gamma$ | 90 90 90                          |
| Space group             | P 4 <sub>1</sub> 2 <sub>1</sub> 2 |
| Wavelength              | 0.8726 Å                          |
| Resolution              | 48.82 (1.85)                      |
| I/ $\sigma$             | 26.3 (3.9)                        |
| R merge                 | 0.073 (0.84)                      |
| CC 1/2                  | 1 (0.86)                          |
| Completeness            | 100 (100)                         |
| Unique reflections      | 29933                             |
| Multiplicity            | 17.2 (17.5)                       |
| Anomalous multiplicity  | 9.2 (9.1)                         |
| FOM                     | 0.45                              |

  

| <b>Refinement</b>  |       |
|--------------------|-------|
| R <sub>cryst</sub> | 0.18  |
| R <sub>free</sub>  | 0.22  |
| Rms bond length    | 0.022 |
| Rms Bond angles    | 2.209 |

  

| <b>Ramachandran Plot</b> |     |
|--------------------------|-----|
| Number of residues       | 214 |
| Preferred regions        | 208 |
| Allowed regions          | 6   |
| Outliers                 | 0   |

Values in parentheses are for the highest resolution shell.

**Table S2: *E. coli* K12 strains used in this study**

| <b>Strain</b>                 | <b>Description<sup>a</sup> and Reference</b>                         |
|-------------------------------|----------------------------------------------------------------------|
| <i>E. coli</i> MS411          | <i>ilvG rfb-50 thi</i> (M. Schembri; DTU, Denmark)                   |
| <i>E. coli</i> CSH26Cm::LTL   | Tc <sup>R</sup> , CSH26 <i>galK::cat::loxP-Tet-loxP</i> (Lang, 2010) |
| <i>E. coli</i> BL21(DE3) Star | F- ompT hsdSB (rB-mB-) gal dcm rne131 (DE3) (Life Technologies)      |

<sup>a</sup>antibiotic resistance: Tc, tetracycline.

**Table S3: Plasmids and primers used in this study**

| <b>Plasmid</b>             | <b>Description<sup>a</sup> and Reference</b>                                                                                    |
|----------------------------|---------------------------------------------------------------------------------------------------------------------------------|
| <i>Cre-fusion plasmids</i> |                                                                                                                                 |
| CFP B                      | Amp <sup>R</sup> ; <i>cre</i> from phage P1 cloned into the <i>NheI</i> and <i>Sall</i> site of pBR322 (Parker and Meyer, 2007) |
| CreTraI(309-992)           | Amp <sup>R</sup> ; CFP B with partial R1 <i>traI</i> encoding residue 309-992 (Lang 2010)                                       |
| CreTraIDC1227              | Amp <sup>R</sup> ; CFP B with partial R1 <i>traI</i> encoding for TraI missing the last 1227 residues (Lang 2010)               |
| CreTraIN992                | Amp <sup>R</sup> ; CFP B with partial R1 <i>traI</i> encoding residue 1-992 (this study)                                        |
| CreTraIN992_A593V          | Amp <sup>R</sup> ; CreTraIN992 derivative encoding a A593V mutation (this study)                                                |
| CreTraIN992_H626L          | Amp <sup>R</sup> ; CreTraIN992 derivative encoding a H626L mutation (this study)                                                |
| CreTraIN992_D714A          | Amp <sup>R</sup> ; CreTraIN992 derivative encoding a D714A mutation (this study)                                                |

|                   |                                                                                         |
|-------------------|-----------------------------------------------------------------------------------------|
| CreTraIN992_D714N | Amp <sup>R</sup> ; CreTraIN992 derivative encoding a D714N mutation (this study)        |
| CreTraIN992_R717Q | Amp <sup>R</sup> ; CreTraIN992 derivative encoding a R717Q mutation (this study)        |
| CreTraIN992_Q736A | Amp <sup>R</sup> ; CreTraIN992 derivative encoding a Q736A mutation (this study)        |
| CreTraIN992_Q736N | Amp <sup>R</sup> ; CreTraIN992 derivative encoding a Q736N mutation (this study)        |
| CreTraIN992_S739A | Amp <sup>R</sup> ; CreTraIN992 derivative encoding a S739A mutation (this study)        |
| CreTraIN992_S739N | Amp <sup>R</sup> ; CreTraIN992 derivative encoding a S739N mutation (this study)        |
| CreTraIN992_V746A | Amp <sup>R</sup> ; CreTraIN992 derivative encoding a V746A mutation (this study)        |
| CreTraIN992_V746N | Amp <sup>R</sup> ; CreTraIN992 derivative encoding a V746N mutation (this study)        |
| CreTraIN992_S757T | Amp <sup>R</sup> ; CreTraIN992 derivative encoding a S757T mutation (this study)        |
| CreTraIN992 F     | Amp <sup>R</sup> ; CFP B with partial F <i>tral</i> encoding residue 1-992 (this study) |

#### Expression Plasmids

|                    |                                                                                                                 |
|--------------------|-----------------------------------------------------------------------------------------------------------------|
| pCG02              | Cm <sup>R</sup> ; pGZ119EH with partial R1 <i>tral</i> encoding residue 1-992 (Lang, 2010)                      |
| pGZTraIN992_A593V  | Cm <sup>R</sup> ; pGZ119EH with partial R1 <i>tral</i> encoding residue 1-992 and a A593V mutation (this study) |
| pGZTraIN992_H626L  | Cm <sup>R</sup> ; pGZ119EH with partial R1 <i>tral</i> encoding residue 1-992 and a H626L mutation (this study) |
| pGZTraIN992_D714 N | Cm <sup>R</sup> ; pGZ119EH with partial R1 <i>tral</i> encoding residue 1-992 and a D714N mutation (this study) |
| pGZTraIN992_Q736 N | Cm <sup>R</sup> ; pGZ119EH with partial R1 <i>tral</i> encoding residue 1-992 and a Q736N mutation (this study) |
| pGZTraIN992_S739N  | Cm <sup>R</sup> ; pGZ119EH with partial R1 <i>tral</i> encoding residue 1-992 and a S739N mutation (this study) |

#### Overexpression Plasmids

|          |                                                                                               |
|----------|-----------------------------------------------------------------------------------------------|
| pCDF_TSA | Spect <sup>R</sup> ; pCDF1b with partial R1 <i>tral</i> encoding residue 530-816 (this study) |
|----------|-----------------------------------------------------------------------------------------------|

#### Conjugative Plasmids

|                    |                                                                             |
|--------------------|-----------------------------------------------------------------------------|
| R1-16              | Km <sup>R</sup> ; IncFII, <i>fin-</i> (Goebel <i>et al.</i> , 1977)         |
| R1-16D <i>tral</i> | Km <sup>R</sup> , Tc <sup>R</sup> ; IncFII, <i>tral::tetRA</i> (Lang, 2010) |
| pOX38              | Km <sup>R</sup> , IncFI, derivative of F (Chandler & Galas, 1983)           |

<sup>a</sup>antibiotic resistance: Amp, ampicillin; Cm, chloramphenicol; Km, kanamycin; Spect, spectinomycin; Tc, tetracycline.

**Table S4: Primers used in this study**

| Primer                               | Primer sequence 5'-3'                |
|--------------------------------------|--------------------------------------|
| TraI_SFW1                            | CATGTAGGTACCAGTATCGCGCAGGTCAGA       |
| TraI_SRev5                           | CATATTGGTACCTTACCCCTGTACCACCGTCAAAC  |
| TraISeqFW2                           | ACCGTCGCTCGCAGAT                     |
| TraI530_FW                           | AGTCGGATCCCGTACAGGTCCTGATAACC        |
| TraI816_Rev                          | AGTCAAGCTTCTAGGAATACAGCCGGACATC      |
| Forward Primer with desired mutation |                                      |
| TraI_V593FW                          | GCCAGCGTGAAAGTCGGAGAAGAGAGC          |
| TraI_L626FW                          | CGTGCTCGGACTCCCTGAGGTGAC             |
| TraI_A714FW                          | TGCCGGTGGCAGCCGGCGAGCGACTG           |
| TraI_N714FW                          | TGCCGGTGGCAAACGGCGAGCGACTG           |
| TraI_Q717FW                          | GCAGACGGCGAGCAACTGAGGGTGACAG         |
| TraI_A736FW                          | GGTGACCGCCTGGCGGTGGCATCCGTCAGT       |
| TraI_N736FW                          | GGTGACCGCCTGAACGTGGCATCCGTCAGT       |
| TraI_A739FW                          | CTGCAGGTGGCAGCCGTCAGTGAAGATG         |
| TraI_N739FW                          | CTGCAGGTGGCAAACGTCAGTGAAGATG         |
| TraI_A746FW                          | AGATGCGATGGCGGTTGTTGTGCC             |
| TraI_N746FW                          | AGATGCGATGAATGTTGTTGTGCC             |
| TraI_T757FW                          | GGGCGGGCTGAACCGGCCACCCTGCCTGTGAGCGAT |

---

Reverse Primer with desired mutation

---

TraI\_V593Rev GCTCTTCTCCGACTTTCACGCTGGC  
TraI\_L626Rev GTCACCTCAGGGAGTCCGAGCACG  
TraI\_A714Rev CAGTCGCTCGCCGGCTGCCACCGCA  
TraI\_N714Rev CAGTCGCTCGCCGTTGCCACCGCA  
TraI\_Q717Rev CTGTCACCCTCAGTTGCTCGCCGTCTGC  
TraI\_A736Rev ACTGACGGATGCCACCGCCAGGCGGTCACC  
TraI\_N736Rev ACTGACGGATGCCACGTTTCAGGCGGTCACC  
TraI\_A739Rev CATCTTCACTGACGGCTGCCACCTGCAG  
TraI\_N739Rev CATCTTCACTGACGTTTGCCACCTGCAG  
TraI\_A746Rev GGCACAACAACCGCCATCGCATCT  
TraI\_N746Rev GGCACAACAACATTCATCGCATCT  
TraI\_T757Rev ATCGCTCACAGGCAGGGTGGCCGGTTCAGCCCGCC

---

<sup>a</sup>italics: enzyme restriction site; bold: desired mutation

Accession numbers: F *tral* (AP001918), R1 *tral* (AY423546)

## Supplementary Figures

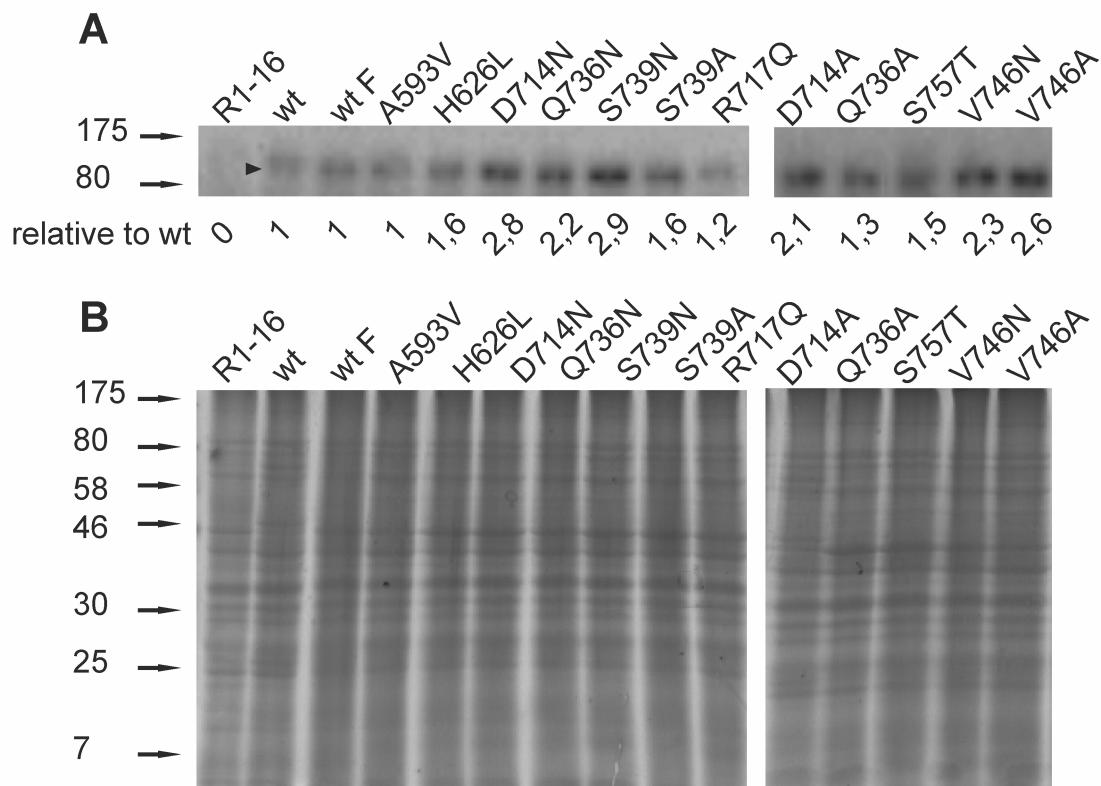

**Fig. S1: Western gel analysis of Cre fusion proteins.** The equivalent of 0,1 A600 units was applied to each well, resolved with 12.5% SDS-PAGE, and transferred to membranes as described in Experimental procedures. Proteins detected with rabbit anti-Cre antibody and peroxidase-conjugated anti-rabbit antibody are shown in (A). Relative protein abundance compared to wild type Cre-TraIN992 is indicated below. To compare the abundance of total protein loaded in each lane, the equivalent of 0,1 A600 units was subjected to SDS-PAGE analysis and visualized by Coomassie staining (B).

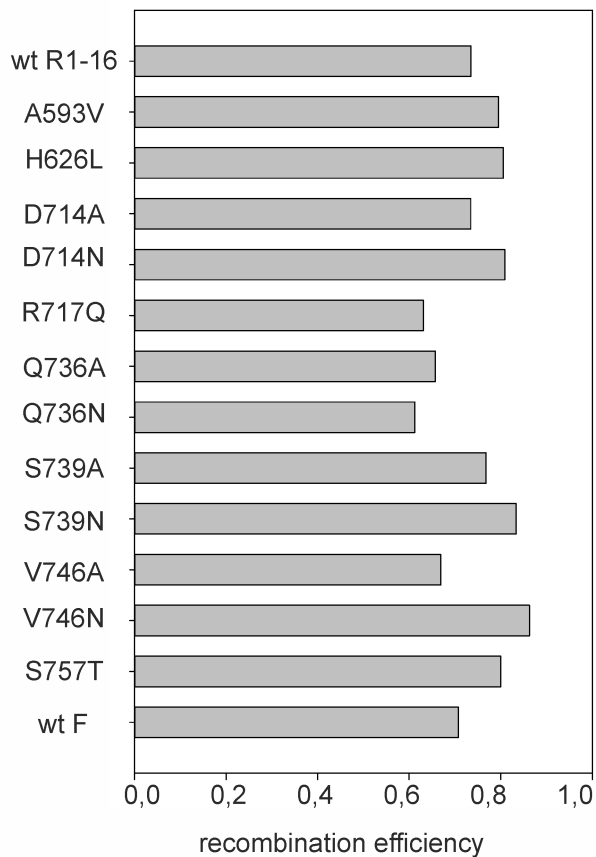

**Fig. S2: Cre-TraIN992 and mutants thereof catalyze recombination after transformation of the CRAfT indicator strain with each expression plasmid.** Approximately 50ng DNA of each construct (*right*) was introduced into the indicator strain. Selection for transformed cells was performed on 100  $\mu\text{g}/\text{ml}$  Amp LB agar plates and recombinants were detected with 10 $\mu\text{g}/\text{ml}$  Cm . Recombination efficiency was calculated as the number of CmR colonies divided by the number of AmpR colonies.

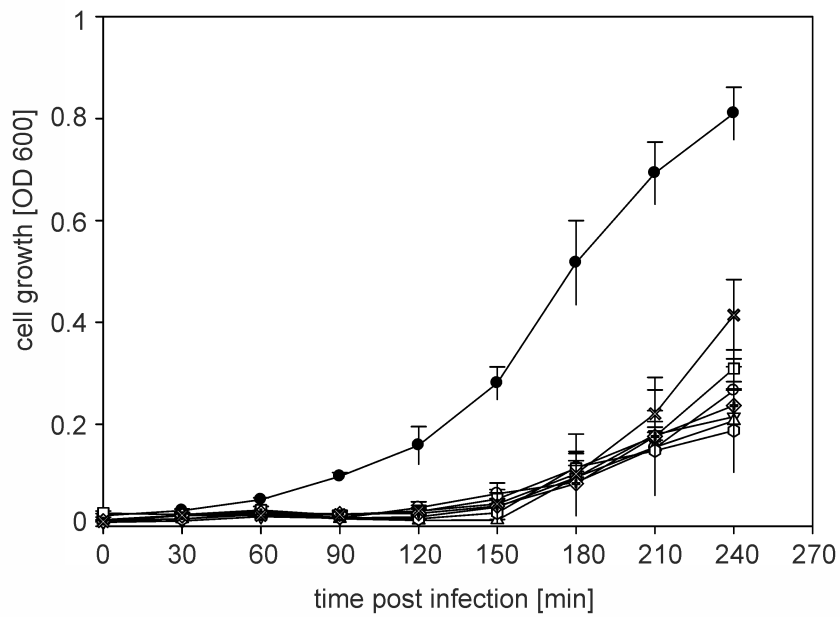

**Fig. S3:** The N-terminal activation domain TraI N<sub>1-992</sub> (▽) and variants thereof are sufficient to complement R1-16D*tral* (●) carrying MS411 host cells for R17 infection to levels equal to wild type MS411 [R1-16] (○). Phage infection was performed as described in Experimental procedures. Variants are indicated with the following symbols: A593V (×), H626L (△), D714N (◊), Q736N (◇), S739N (□)
